# Supplementary material for: Association Between BMI Measured Within a Year After Diagnosis of Type 2 Diabetes and Mortality
Source: Oxford University Press journal article supplement (doi:10.2337/dc12-0944), 2012-11-09
Supplement: dc120944supplementarydata.pdf [file dc120944supplementarydata.pdf]

SUPPLEMENTARY DATA

**Supplementary Table 1.** Characteristics of people included in, and excluded from, analysis.

|                                     | INCLUDED                   |                            | NOT INCLUDED <sup>1</sup>  |                            |
|-------------------------------------|----------------------------|----------------------------|----------------------------|----------------------------|
|                                     | MEN<br><i>n</i> = 58,372   | WOMEN<br><i>n</i> = 48,268 | MEN<br><i>n</i> = 70,585   | WOMEN<br><i>n</i> = 63,344 |
| Total cholesterol mean (SD) [N]     | 5.11 (1.44)<br>[46,853]    | 5.45 (1.42)<br>[38,239]    | 4.96 (1.42)<br>[15,470]    | 5.31 (1.51)<br>[13,640]    |
| HDL mean (SD) [N]                   | 1.15 (0.33)<br>[32,545]    | 1.30 (0.37)<br>[26,494]    | 1.17 (0.39)<br>[9,500]     | 1.32 (0.40)<br>[8,508]     |
| HbA1c (%) mean (SD) [N]             | 8.04 (2.03)<br>[48,487]    | 7.96 (2.00)<br>[40,117]    | 7.89 (2.00)<br>[17,064]    | 7.81 (1.94)<br>[15,447]    |
| Sys. BP (mmHg) mean (SD) [N]        | 140.59 (19.69)<br>[54,424] | 143.00 (20.90)<br>[44,968] | 140.21 (20.81)<br>[21,508] | 142.69 (21.82)<br>[19,389] |
| Dia. BP (mmHg) mean (SD) [N]        | 82.15 (11.53)<br>[54,446]  | 81.32 (11.35)<br>[44,976]  | 81.43 (12.62)<br>[21,528]  | 80.85 (12.82)<br>[19,401]  |
| Age(yrs) <sup>2</sup> mean (SD) [N] | 59.5 (11.9)<br>[58,372]    | 62.3 (12.5)<br>[48,268]    | 59.4 (12.9)<br>[70,585]    | 63.0 (13.9)<br>[63,344]    |
| Smoking status <sup>3</sup>         |                            |                            |                            |                            |
| % current [N]                       | 25.0 [14,571]              | 23.3 [11,223]              | 25.7 [15,519]              | 22.1 [11,473]              |
| % former [N]                        | 39.5 [23,036]              | 29.3 [14,155]              | 36.7 [22,127]              | 26.6 [13,835]              |
| % never [N]                         | 35.6 [20,765]              | 47.4 [22,890]              | 37.6 [22,722]              | 51.3 [26,634]              |
| SIMD                                |                            |                            |                            |                            |
| % Q1 [N]                            | 16.3 [9,484]               | 13.9 [6,694]               | 14.8 [10,350]              | 12.4 [7,780]               |
| % Q2 [N]                            | 18.9 [10,950]              | 17.0 [8,173]               | 19.3 [13,481]              | 17.5 [10,992]              |
| % Q3 [N]                            | 20.0 [11,619]              | 19.9 [9,550]               | 21.7 [15,181]              | 20.8 [13,081]              |
| % Q4 [N]                            | 22.4 [12,291]              | 23.9 [11,455]              | 22.1 [15,449]              | 23.7 [14,866]              |
| % Q5 [N]                            | 22.4 [13,006]              | 25.3 [12,148]              | 22.2 [15,779]              | 25.7 [16,118]              |

<sup>1</sup> Sex not recorded for 79 patients

<sup>2</sup> At time of diagnosis with diabetes.

<sup>3</sup> Within one year of diagnosis with diabetes. This differs from the representation of smoking status featured in the regression models; the latter used the measurement of smoking status which was closest in time to the date on which the index BMI measurement was recorded.

**Supplementary Table 2.** Age at diagnosis with diabetes and socioeconomic status, by inclusion group.

|               | excluded:<br>no BMI data |             | excluded:<br>BMI outside one year from<br>diagnosis T2DM |             | included in analysis |             |
|---------------|--------------------------|-------------|----------------------------------------------------------|-------------|----------------------|-------------|
|               | MEN                      | WOMEN       | MEN                                                      | WOMEN       | MEN                  | WOMEN       |
| Age mean (SD) | 67.3 (12.8)              | 72.6 (12.5) | 57.3 (12.2)                                              | 60.2 (13.0) | 59.5 (11.9)          | 62.3 (12.5) |
| SIMD          |                          |             |                                                          |             |                      |             |
| % Q1          | 12.9                     | 13.2        | 15.4                                                     | 12.2        | 16.3                 | 13.9        |
| % Q2          | 20.5                     | 19.5        | 19.3                                                     | 17.1        | 18.9                 | 17.0        |
| % Q3          | 22.9                     | 21.0        | 21.7                                                     | 21.0        | 20.0                 | 19.9        |
| % Q4          | 20.6                     | 21.6        | 22.0                                                     | 24.1        | 22.4                 | 23.9        |
| % Q5          | 23.2                     | 24.7        | 21.6                                                     | 25.5        | 22.4                 | 25.3        |

SUPPLEMENTARY DATA

**Supplementary Table 3.** Hazard ratio estimates for effect of BMI on all-cause mortality; stratified by smoking status. Estimates are adjusted for age at BMI determination. Deaths within two years of BMI determination are excluded. Numbers of patients (deaths) are: Men, never smoked – 20,765 (1,674); Men, current / former smokers – 37,607 (3,598); Women, never smoked – 22,890 (1,894); Women, current / former smokers – 25,378 (2,465).

| BMI (kg / m <sup>2</sup> ) | NEVER SMOKED        |                     | CURRENT / FORMER SMOKERS |                     |
|----------------------------|---------------------|---------------------|--------------------------|---------------------|
|                            | MEN                 | WOMEN               | MEN                      | WOMEN               |
|                            | HR (95% CI)         | HR (95% CI)         | HR (95% CI)              | HR (95% CI)         |
| 20 to < 25                 | 1.10 (0.96 to 1.25) | 1.21 (1.07 to 1.37) | 1.28 (1.17 to 1.40)      | 1.41 (1.26 to 1.57) |
| 25 to < 30                 | 1.00                | 1.00                | 1.00                     | 1.00                |
| 30 to < 35                 | 0.98 (0.87 to 1.10) | 1.07 (0.95 to 1.21) | 0.96 (0.89 to 1.04)      | 1.01 (0.91 to 1.13) |
| 35 to < 40                 | 1.30 (1.08 to 1.56) | 1.14 (0.98 to 1.33) | 1.08 (0.95 to 1.22)      | 1.06 (0.93 to 1.22) |
| 40 to < 45                 | 1.89 (1.42 to 2.51) | 1.38 (1.11 to 1.72) | 1.12 (0.89 to 1.42)      | 1.31 (1.09 to 1.59) |
| 45 to < 50                 | 1.09 (0.56 to 2.10) | 1.94 (1.40 to 2.70) | 2.08 (1.44 to 2.99)      | 1.72 (1.30 to 2.28) |

**Supplementary Table 4.** Hazard ratio estimates for effect of BMI (increase of 5 kg / m<sup>2</sup> from 20-<30kg/m<sup>2</sup> or from 30-<50 kg/m<sup>2</sup> according to stratum) on mortality from specific causes, spilt by sex, by numbers of years from BMI determination of excluded deaths. Estimates are adjusted for age at BMI recording and for smoking status (never vs. current / former). Numbers of patients and deaths are also given for each sex.

| exclusion period | BMI category (kg / m <sup>2</sup> ) | MEN HR (95% CI)     | WOMEN HR (95% CI)   | MEN no. of patients (deaths) | WOMEN no. of patients (deaths) |
|------------------|-------------------------------------|---------------------|---------------------|------------------------------|--------------------------------|
| 0 years          | 20 to < 25                          | 1.38 (1.29 to 1.46) | 1.39 (1.30 to 1.49) | 7,210 (1,546)                | 6,321 (1,332)                  |
|                  | 25 to < 30                          | 1.00                | 1.00                | 23,026 (3,155)               | 14,885 (2,018)                 |
|                  | 30 to < 35                          | 0.94 (0.89 to 1.00) | 1.00 (0.94 to 1.07) | 19,524 (1,883)               | 14,334 (1,462)                 |
|                  | 35 to < 40                          | 1.10 (1.00 to 1.20) | 1.06 (0.98 to 1.16) | 7,620 (595)                  | 8,660 (689)                    |
|                  | 40 to < 45                          | 1.29 (1.11 to 1.51) | 1.19 (1.05 to 1.35) | 2,562 (177)                  | 4,146 (282)                    |
|                  | 45 to < 50                          | 1.67 (1.29 to 2.18) | 1.70 (1.41 to 2.04) | 857 (58)                     | 1,678 (123)                    |
| 2 years          | 20 to < 25                          | 1.22 (1.13 to 1.32) | 1.32 (1.22 to 1.44) | 6,586 (988)                  | 5,863 (921)                    |
|                  | 25 to < 30                          | 1.00                | 1.00                | 22,057 (2,303)               | 14,293 (1,498)                 |
|                  | 30 to < 35                          | 0.97 (0.91 to 1.04) | 1.04 (0.96 to 1.12) | 18,962 (1,385)               | 13,941 (1,111)                 |
|                  | 35 to < 40                          | 1.14 (1.03 to 1.27) | 1.10 (0.99 to 1.21) | 7,427 (430)                  | 8,454 (510)                    |
|                  | 40 to < 45                          | 1.34 (1.12 to 1.61) | 1.34 (1.17 to 1.55) | 2,506 (127)                  | 4,078 (227)                    |
|                  | 45 to < 50                          | 1.70 (1.24 to 2.34) | 1.81 (1.46 to 2.24) | 834 (39)                     | 1,639 (92)                     |
| 5 years          | 20 to < 25                          | 1.13 (1.02 to 1.26) | 1.27 (1.13 to 1.43) | 5,879 (457)                  | 5,216 (432)                    |
|                  | 25 to < 30                          | 1.00                | 1.00                | 20,578 (1,151)               | 13,316 (757)                   |
|                  | 30 to < 35                          | 1.02 (0.92 to 1.12) | 1.04 (0.93 to 1.16) | 18,037 (692)                 | 13,206 (559)                   |
|                  | 35 to < 40                          | 1.24 (1.07 to 1.44) | 1.11 (0.96 to 1.29) | 7,136 (211)                  | 8,113 (251)                    |
|                  | 40 to < 45                          | 1.18 (0.89 to 1.56) | 1.40 (1.15 to 1.71) | 2,405 (52)                   | 3,933 (115)                    |
|                  | 45 to < 50                          | 1.79 (1.12 to 2.85) | 1.97 (1.47 to 2.65) | 806 (18)                     | 1,576 (48)                     |

SUPPLEMENTARY DATA

**Supplementary Table 5.** Hazard ratio estimates for effect of BMI (increase of 5 kg / m<sup>2</sup>) on mortality from any cause. Estimates are adjusted for additional predictors shown in leftmost column (age at BMI determination; smoking status [never vs. current / former]; SIMD quintile; HbA1c measured within one year of diagnosis with diabetes; and year of diagnosis). Deaths within two years of BMI determination are excluded.

| predictors                                                                                              | MEN                                         |                     |                                             |                     |
|---------------------------------------------------------------------------------------------------------|---------------------------------------------|---------------------|---------------------------------------------|---------------------|
|                                                                                                         | 20 to < 30 kg / m <sup>2</sup> (n = 28,643) |                     | 30 to < 50 kg / m <sup>2</sup> (n = 29,729) |                     |
|                                                                                                         | deaths                                      | HR (95% CI)         | deaths                                      | HR (95% CI)         |
| BMI / age / smoking                                                                                     | 3,291                                       | 0.82 (0.76 to 0.88) | 1,981                                       | 1.21 (1.14 to 1.29) |
| BMI / age / smoking / SIMD quintile                                                                     | 3,268                                       | 0.81 (0.75 to 0.88) | 1,970                                       | 1.20 (1.13 to 1.28) |
| BMI / age / smoking / SIMD quintile / HbA1c                                                             | 2,129                                       | 0.81 (0.74 to 0.89) | 1,343                                       | 1.20 (1.11 to 1.29) |
| BMI / age / smoking / SIMD quintile / HbA1c / year of diagnosis                                         | 2,129                                       | 0.81 (0.74 to 0.89) | 1,343                                       | 1.20 (1.11 to 1.29) |
| BMI / age / smoking / SIMD quintile / HbA1c / year of diagnosis / total cholesterol / HDL / systolic BP | 1,013                                       | 0.84 (0.73 to 0.97) | 706                                         | 1.17 (1.05 to 1.30) |
| predictors                                                                                              | WOMEN                                       |                     |                                             |                     |
|                                                                                                         | 20 to < 30 kg / m <sup>2</sup> (n = 20,156) |                     | 30 to < 50 kg / m <sup>2</sup> (n = 28,112) |                     |
|                                                                                                         | deaths                                      | HR (95% CI)         | deaths                                      | HR (95% CI)         |
| BMI / age / smoking                                                                                     | 2,419                                       | 0.77 (0.71 to 0.84) | 1,940                                       | 1.16 (1.10 to 1.22) |
| BMI / age / smoking / SIMD quintile                                                                     | 2,407                                       | 0.76 (0.70 to 0.82) | 1,920                                       | 1.16 (1.10 to 1.22) |
| BMI / age / smoking / SIMD quintile / HbA1c                                                             | 1,560                                       | 0.77 (0.69 to 0.85) | 1,242                                       | 1.14 (1.07 to 1.22) |
| BMI / age / smoking / SIMD quintile / HbA1c / year of diagnosis                                         | 1,560                                       | 0.77 (0.69 to 0.85) | 1,242                                       | 1.14 (1.07 to 1.22) |
| BMI / age / smoking / SIMD quintile / HbA1c / year of diagnosis / total cholesterol / HDL / systolic BP | 734                                         | 0.78 (0.67 to 0.90) | 595                                         | 1.22 (1.11 to 1.34) |

SUPPLEMENTARY DATA

**Supplementary Table 6.** (revised - all models based on a consistent subset of patients with data for all variables): Hazard ratio estimates for effect of BMI (increase of 5 kg / m<sup>2</sup>) on mortality from any cause. Estimates are adjusted for additional predictors shown in leftmost column (age at BMI determination; smoking status [never vs. current / former]; SIMD quintile; HbA1c measured within one year of diagnosis with diabetes; and year of diagnosis). Deaths within two years of BMI determination are excluded.

| predictors                                                                                              | MEN                                         |                     |                                             |                     |
|---------------------------------------------------------------------------------------------------------|---------------------------------------------|---------------------|---------------------------------------------|---------------------|
|                                                                                                         | 20 to < 30 kg / m <sup>2</sup> (n = 14,869) |                     | 30 to < 50 kg / m <sup>2</sup> (n = 16,120) |                     |
|                                                                                                         | deaths                                      | HR (95% CI)         | deaths                                      | HR (95% CI)         |
| BMI / age / smoking                                                                                     | 1,013                                       | 0.86 (0.75 to 0.99) | 706                                         | 1.16 (1.04 to 1.29) |
| BMI / age / smoking / SIMD quintile                                                                     | 1,013                                       | 0.85 (0.74 to 0.98) | 706                                         | 1.15 (1.03 to 1.28) |
| BMI / age / smoking / SIMD quintile / HbA1c                                                             | 1,013                                       | 0.85 (0.74 to 0.98) | 706                                         | 1.15 (1.03 to 1.28) |
| BMI / age / smoking / SIMD quintile / HbA1c / year of diagnosis                                         | 1,013                                       | 0.85 (0.74 to 0.98) | 706                                         | 1.15 (1.03 to 1.28) |
| BMI / age / smoking / SIMD quintile / HbA1c / year of diagnosis / total cholesterol / HDL / systolic BP | 1,013                                       | 0.84 (0.73 to 0.97) | 706                                         | 1.17 (1.05 to 1.30) |
|                                                                                                         | WOMEN                                       |                     |                                             |                     |
|                                                                                                         | 20 to < 30 kg / m <sup>2</sup> (n = 10,327) |                     | 30 to < 50 kg / m <sup>2</sup> (n = 14,993) |                     |
|                                                                                                         | deaths                                      | HR (95% CI)         | deaths                                      | HR (95% CI)         |
| BMI / age / smoking                                                                                     | 734                                         | 0.79 (0.68 to 0.91) | 595                                         | 1.22 (1.11 to 1.34) |
| BMI / age / smoking / SIMD quintile                                                                     | 734                                         | 0.78 (0.67 to 0.90) | 595                                         | 1.22 (1.11 to 1.34) |
| BMI / age / smoking / SIMD quintile / HbA1c                                                             | 734                                         | 0.78 (0.67 to 0.90) | 595                                         | 1.22 (1.11 to 1.34) |
| BMI / age / smoking / SIMD quintile / HbA1c / year of diagnosis                                         | 734                                         | 0.78 (0.67 to 0.90) | 595                                         | 1.22 (1.11 to 1.34) |
| BMI / age / smoking / SIMD quintile / HbA1c / year of diagnosis / total cholesterol / HDL / systolic BP | 734                                         | 0.78 (0.67 to 0.90) | 595                                         | 1.22 (1.11 to 1.34) |

## SUPPLEMENTARY DATA

### Supplementary Figure 1. Case Flow

[START]

N = 240,648 people with Type 2 diabetes and valid date of diagnosis

exclude 16,038 with no BMI data → N = 224,610

exclude 11,510 who die within 2 years of index BMI measurement → N = 213,100

exclude 4,992 with index BMI outside range  $\geq 20$  and  $< 50$  → N = 208,108

exclude 94,250 for whom index BMI not within 1 yr of diabetes diagnosis → N = 113,858

exclude 5,384 for whom index BMI taken after 31/12/2007 → N = 108,474

exclude 22 due to miscellaneous date anomalies → N = 108,452

exclude 1,812 due to no smoking status → N = 106,640

[END]

SUPPLEMENTARY DATA

**Supplementary Figure 2.** Distribution of index BMI measurements by year of recording (years prior to 1996 are combined into a single group).

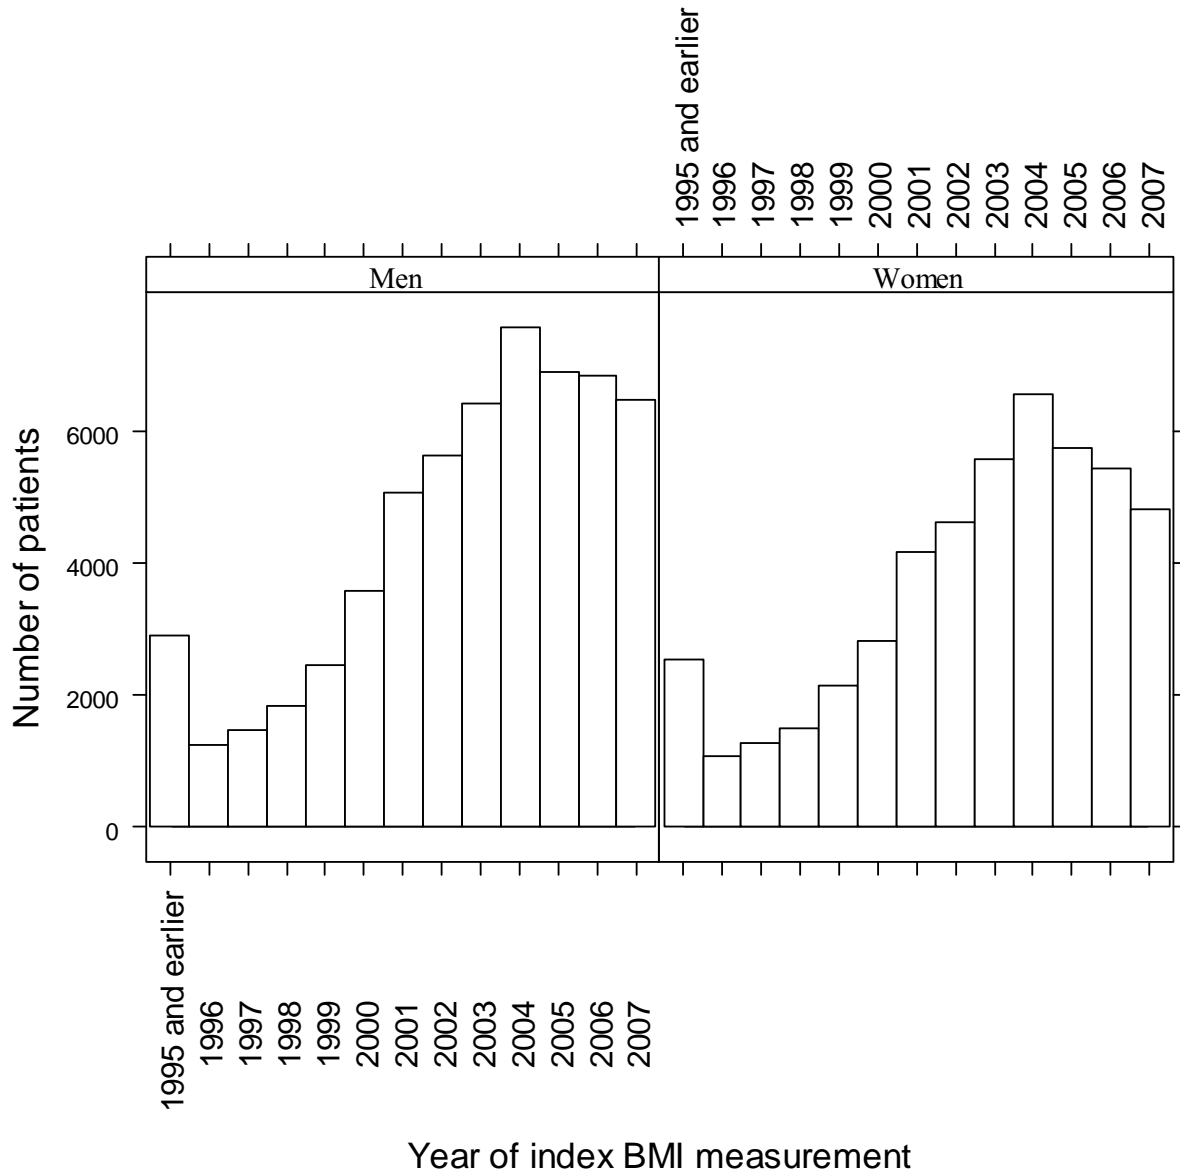

SUPPLEMENTARY DATA

**Supplementary Figure 3a.** Log of the negative log of the survival function plotted against time, for three inclusion status groups - MEN

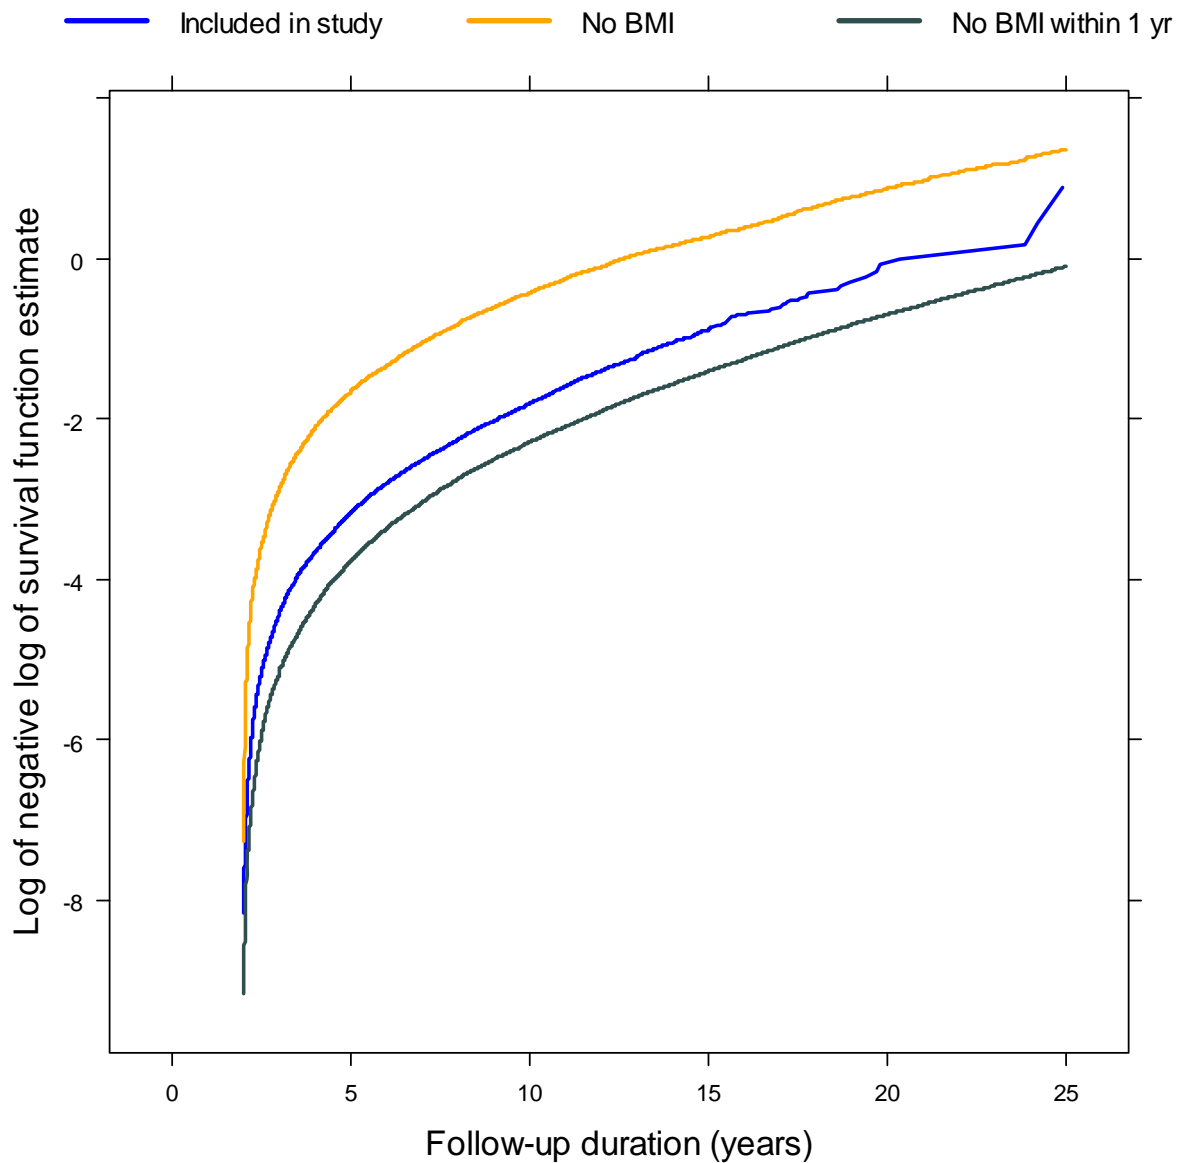

SUPPLEMENTARY DATA

**Supplementary Figure 3b.** Log of the negative log of the survival function plotted against time, for three inclusion status groups - WOMEN

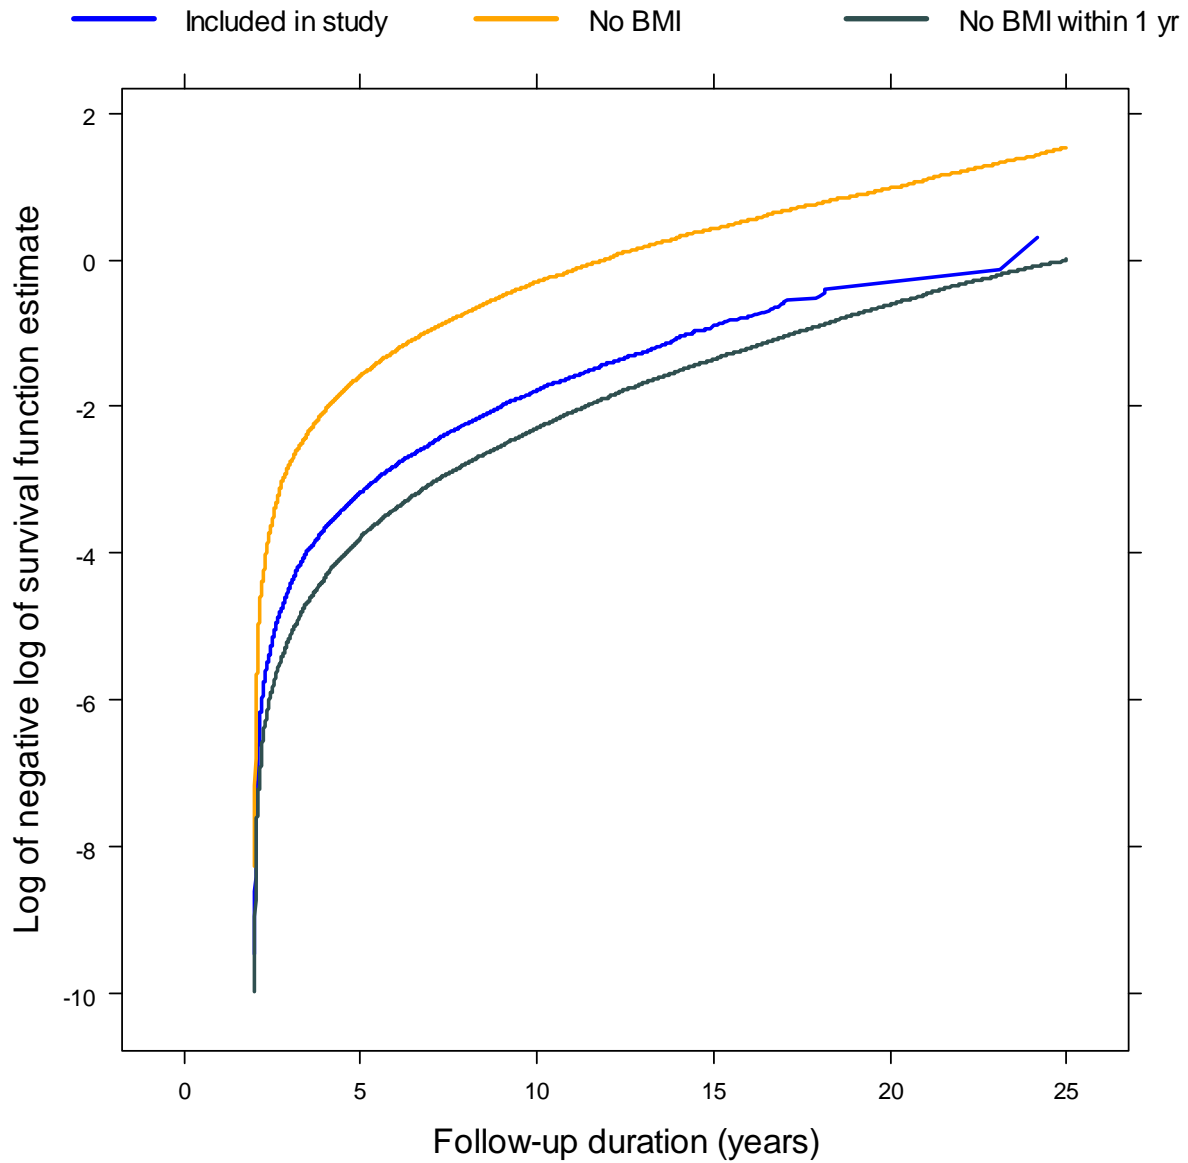



## SUPPLEMENTARY DATA

### **List of additional collaborators**

John Chalmers, FRCPE, Victoria Hospital, Kirkcaldy

Scott G. Cunningham BSc (Hons), Clinical Technology Centre, University of Dundee

Alistair Emslie-Smith, MB ChB, Mill Practice, Arthursstone Medical Centre, Dundee

Shona Brearley, BSc (Hons) RN Scottish Diabetes Research Network

Andrew Judson, PhD, Health Informatics Centre, University of Dundee

John Kernthaler, PhD, Health Informatics Centre, University of Dundee

Ritchie McAlpine, Ninewells Hospital, Dundee

Frank Sullivan, FRCGP, NHS Tayside Professor of Research and Development in General Practice and Primary Care, Division of Clinical & Population Sciences and Education, University of Dundee

John Petrie, PhD, Institute of Cardiovascular and Medical Sciences, University of Glasgow

Donald Pearson FRCP, School of Medical Sciences, University of Aberdeen

Helen Colhoun PhD, Biomedical Research Institute, University of Dundee
